# Supplementary material for: Graph-Based Approaches Significantly Improve the Recovery of Antibiotic Resistance Genes From Complex Metagenomic Datasets
Source: PubMed Central journal article supplement (PMC8528159; doi:10.3389/fmicb.2021.714836), 2021-10-06
Supplement: Data_Sheet_1.pdf [file Data_Sheet_1.pdf]

|            | Total vertices | Total nucleotides | Total paths | GFA file size |
|------------|----------------|-------------------|-------------|---------------|
| SRR5997540 | 3034188        | 1546182930        | 1466318     | 424 Mb        |
| SRR5997541 | 2688536        | 1355997296        | 1285372     | 372 Mb        |
| SRR5997542 | 2953400        | 1340318360        | 1439680     | 372 Mb        |
| SRR5997543 | 2515768        | 1232593374        | 1230552     | 339 Mb        |
| SRR5997544 | 4444240        | 1781622996        | 2151588     | 504 Mb        |
| SRR5997545 | 3494092        | 1471059268        | 1730428     | 412 Mb        |
| SRR5997546 | 4056072        | 1690748804        | 1987258     | 478 Mb        |
| SRR5997547 | 3744292        | 1551951858        | 1835650     | 438 Mb        |
| SRR5997548 | 2202340        | 1114128928        | 1059954     | 305 Mb        |
| SRR5997549 | 3428164        | 1407665344        | 1664672     | 397 Mb        |
| SRR5997550 | 3550116        | 1495352614        | 1719294     | 420 Mb        |
| SRR5997551 | 2570028        | 1274530320        | 1227478     | 351 Mb        |
| SRR5997552 | 2865424        | 1447288162        | 1364620     | 397 Mb        |

**Supplementary Table 1.** Number of vertices, edges, nucleotides and graph size in each sample from URBAN collection

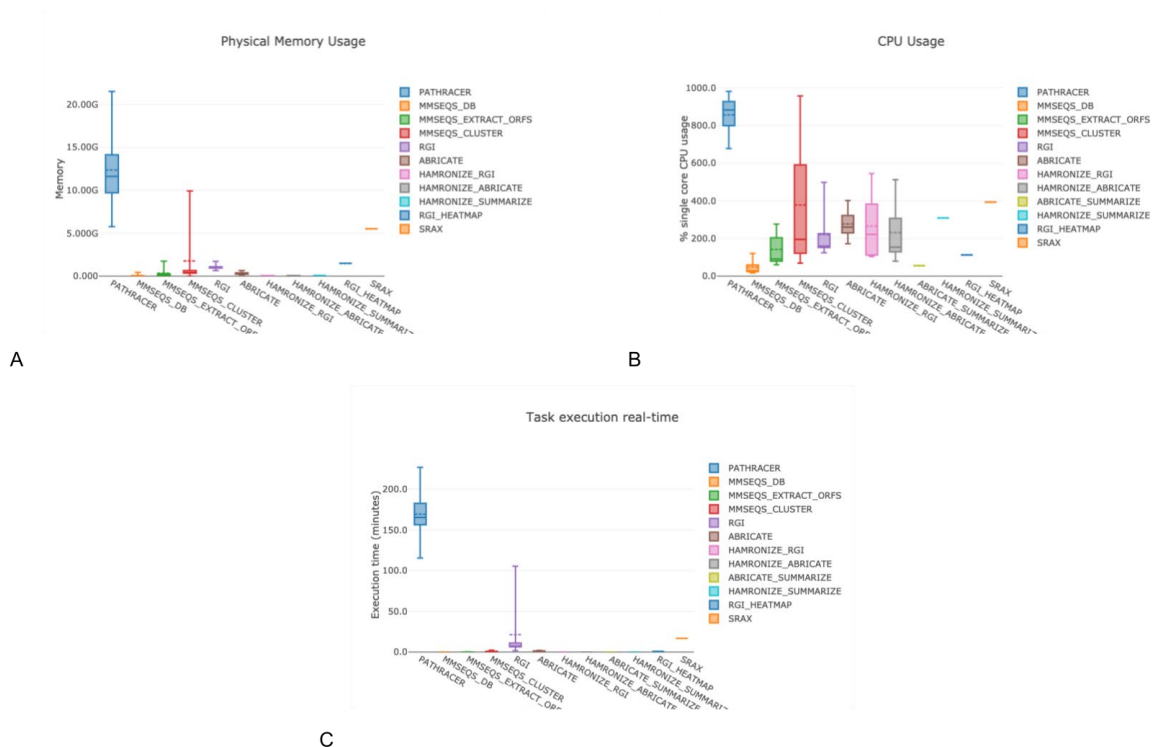

**Supplementary Figure 1.** Summary information about the performance (memory usage, CPU usage, execution runtime) of the pipeline on URBAN collection.

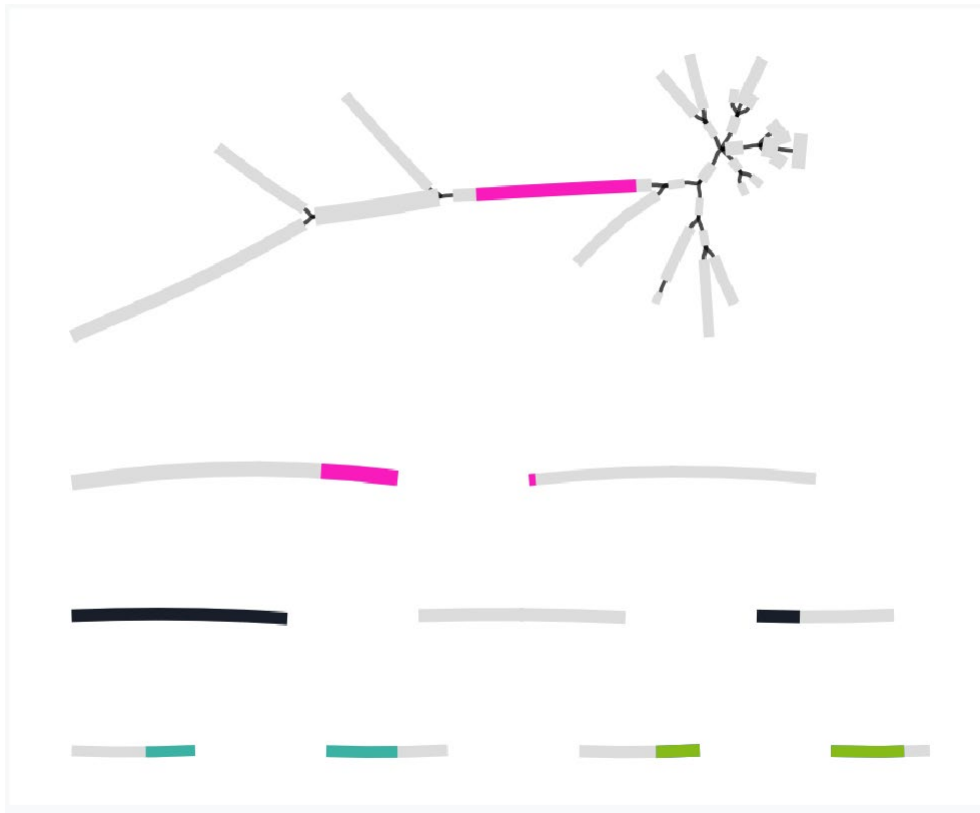

**Supplementary Figure 2.** Locations of the predicted AMR gene sequences from the reads of the SRR5997542 on the assembly graph. These genes were not detected in clustered HMM paths since the genes are located on different edges that are not related to each other.
